# Supplementary material for: Collapsars as a major source of r-process elements
Source: Springer Nature journal article supplement (doi:10.1038/s41586-019-1136-0), 2019-05-01
Supplement: 41586_2019_1136_MOESM1_ESM.pdf [file 41586_2019_1136_MOESM1_ESM.pdf]

In the format provided by the authors and unedited.

# Collapsars as a major source of r-process elements

Daniel M. Siegel<sup>1,2,3,4\*</sup>, Jennifer Barnes<sup>1,2</sup> & Brian D. Metzger<sup>1,2</sup>

---

<sup>1</sup>Department of Physics, Columbia University, New York, NY, USA. <sup>2</sup>Columbia Astrophysics Laboratory, Columbia University, New York, NY, USA. <sup>3</sup>Perimeter Institute for Theoretical Physics, Waterloo, Ontario, Canada. <sup>4</sup>University of Guelph, Guelph, Ontario, Canada. \*e-mail: [dsiegel@perimeterinstitute.ca](mailto:dsiegel@perimeterinstitute.ca)

Supplementary Table 1: **Collapsar accretion disk ejecta.**

| model | $M_{\text{in}}$ | GRB  | $r$ -process | light $r$ -process | $^{56}\text{Ni}$ |
|-------|-----------------|------|--------------|--------------------|------------------|
| E15   | 10.86           | 0.87 | 0.90         | 0.12               | 0.059            |
| E20   | 11.01           | 1.77 | 1.93         | 0.10               | 0.024            |
| E25   | 5.45            | 1.61 | 1.56         | 0.03               | 0.002            |
| E15B  | 13.26           | 0.10 | 0.02         | 0.31               | 0.17             |
| E20B  | 15.19           | 0.70 | 0.84         | 0.40               | 0.12             |
| F15B  | 12.89           | 0.30 | 0.17         | 0.38               | 0.15             |
| F20B  | 14.76           | 0.69 | 0.99         | 0.37               | 0.11             |

Listed are the amount of collapsar disk wind ejecta (in units of  $M_{\odot}$ ) from circularization of fallback material during the different accretion stages (see Fig. 1; Methods) for various presupernova models<sup>95</sup>, with names and masses listed in the two leftmost columns. Masses are calculated assuming a fraction  $f_w = 0.3$  of inflowing mass is ejected in disk winds. The  $^{56}\text{Ni}$  masses are calculated using the model for nickel disk winds at late times (see Methods).
